# Supplementary material
Source: Research Square preprint supplement (doi:10.21203/rs.3.rs-9280941/v1)
Supplement: Supplementary file 1 [file ee6848ec9e231eed4e6f66b3.docx]

**Supporting Information**

On the development of sustainable covalent adaptable networks based on epoxidized soybean oil acrylate and cystamine

Leonardo Giribaldi1, Giacomo Damonte1, Alberto Fina2, Camilla Noè3, Alessandro Pellis1*, Orietta Monticelli1*

1Dipartimento di Chimica e Chimica Industriale, Università degli Studi di Genova, Via Dodecaneso 31, 16146 Genoa, Italy

2Dipartimento di Scienza Applicata e Tecnologia, Politecnico di Torino, Viale Teresa Michel 5, Alessandria, Italy

3Dipartimento di Scienza Applicata e Tecnologia, Politecnico di Torino, C.so Duca Degli Abruzzi 24, 10129 Torino, Italy


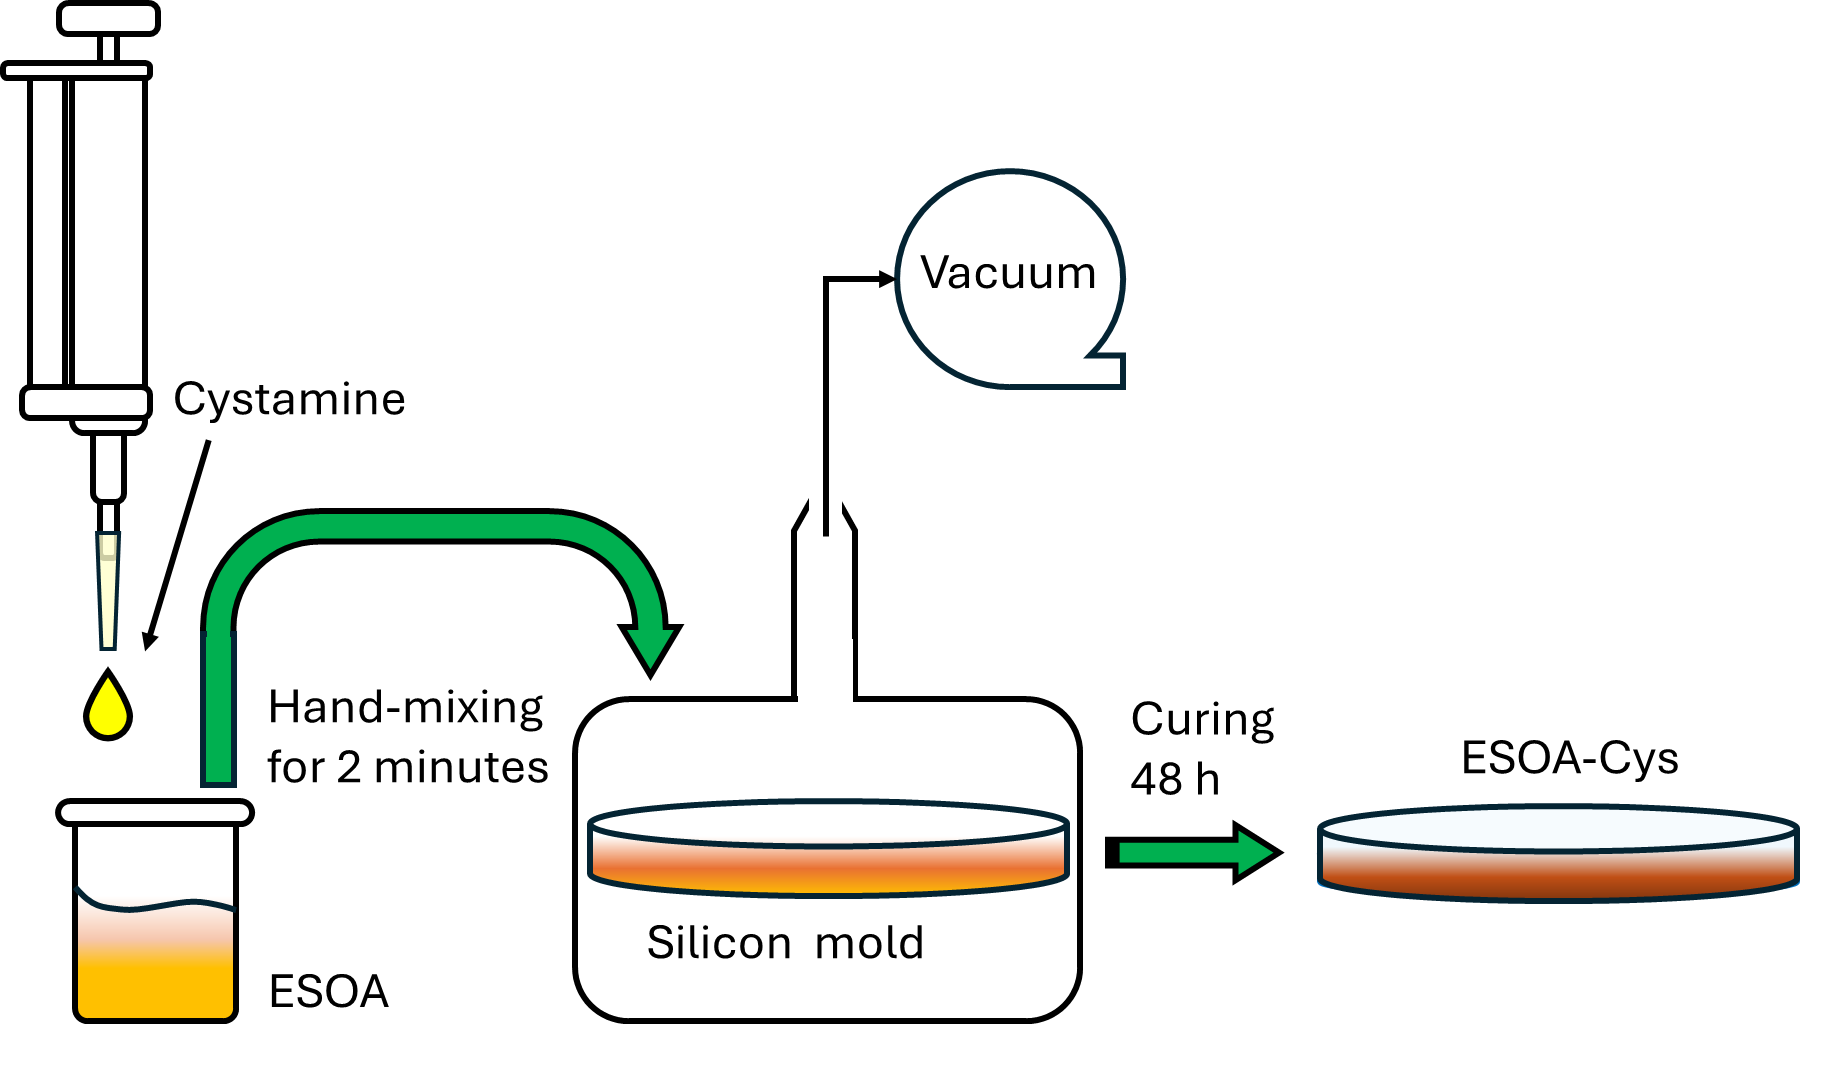


**Fig. S1** Scheme of preparation of ESOA-Cys formulations

**Fig. S2** FT-IR spectrum of Cys

**Fig. S3** FT-IR spectrum of ESOA

| **30 °C** | | **50 °C** | | **100 °C** | |
| --- | --- | --- | --- | --- | --- |
| *Time (h)* | *Normalized peak area (a.u.)* | *Time (h)* | *Normalized peak area (a.u.)* | *Time (h)* | *Normalized peak area (a.u.)* |
| 0 | 1 | 0 | 1 | 0 | 1 |
| 0.5 | 0.827 | 0.25 | 0.851 | 0.028 | 0.156 |
| 1 | 0.437 | 0.5 | 0.645 | 0.054 | 0.079 |
| 1.5 | 0.309 | 0.75 | 0.458 | 0.117 | 0.034 |
| 2 | 0.278 | 1 | 0.246 | 0.167 | 0.003 |
| 3 | 0.161 | 1.25 | 0.171 | 0.233 | 0 |
| 4 | 0.143 | 1.5 | 0.0898 | - | - |
| 5 | 0.072 | 1.75 | 0.038 | - | - |
| 6 | 0.052 | 2 | 0.064 | - | - |
| 24 | 0 | 2.5 | 0.023 | - | - |
| - | - | 3 | 0.019 | - | - |
| - | - | 4 | 0 | - | - |

**Table S1** FT-IR peak areas for the curing process of ESOA-Cys_1:1. Red data values were used for kinetic fitting.

| **30 °C** | | **50 °C** | | **100 °C** | |
| --- | --- | --- | --- | --- | --- |
| *Time (h)* | *Normalized peak area (a.u.)* | *Time (h)* | *Normalized peak area (a.u.)* | *Time (h)* | *Normalized peak area (a.u.)* |
| 0 | 1 | 0 | 1 | 0 | 1 |
| 1 | 0.785 | 0.25 | 0.735 | 0.017 | 0.673 |
| 1.5 | 0.878 | 0.5 | 0.534 | 0.083 | 0.523 |
| 2 | 0.750 | 0.75 | 0.418 | 0.133 | 0.513 |
| 4 | 0.647 | 1 | 0.374 | 0.171 | 0.506 |
| 5 | 0.598 | 1.25 | 0.321 | 0.275 | 0.466 |
| 6 | 0.509 | 1.5 | 0.421 | - | - |
| 24 | 0.359 | 1.75 | 0.258 | - | - |
| 48 | 0.335 | 2 | 0.283 | - | - |
| - | - | 2.5 | 0.281 | - | - |
| - | - | 3 | 0.279 | - | - |
| - | - | 4 | 0.253 | - | - |
| - | - | 5 | 0.272 | - | - |
| - | - | 6 | 0.167 | - | - |

**Table S2.** FT-IR peak areas for the curing process of ESOA-Cys_2:1. Red data values were used for kinetic fitting.

**Fig. S4** FT-IR spectrum of ESOA-Cys_1:1_100_48 (red) and ESOA-Cys_2:1_100_48 (blue)

**Fig. S5** FT-IR calculated conversions relative to curing processes of ESOA-Cys_1:1 (a) and ESOA-Cys_2:1 (b) mixtures at 30 °C (blue), 50 °C (green), and 100 °C (red)

(**S1**)

(**S2**)

**Table S3.** Fitting line equations and determination coefficients for ESOA-Cys formulation at different temperatures

| Sample | T [°C] | Fitting line equation Pseudo-first-order | R2* | Fitting line equation Pseudo-second-order | R2** |
| --- | --- | --- | --- | --- | --- |
| **ESOA-Cys_1:1** | 30 | y = 0.4782x + 0.2036 | 0.9651 | y = 1.425x - 0.4391 | 0.906 |
| 50 | y = 1.4952x - 0.0883 | 0.9517 | y = 17.55x - 8.1794 | 0.841 |
| 100 | y = 11.851x + 0.5183 | 0.9358 | y = 143.14x - 10.093 | 0.676 |
| **ESOA-Cys_2:1** | 30 | y = 0.1161x + 0.114 | 0.9124 | y = 0.0551x + 0.3309 | 0.9444 |
| 50 | y = 1.0135x + 0.0517 | 0.9733 | y = 0.4076x + 0.2285 | 0.9914 |
| 100 | y = 1.3534x + 0.2042 | 0.7194 | y = 0.6025x + 0.3723 | 0.7738 |

*: Valid for the pseudo-first-order equation. **: Valid for the pseudo-second-order equation

**Fig. S6** Second-order kinetic integral function for ESOA-Cys_2:1 at 50 °C, showing the change in linearity above 60% conversion

(**S3**)

(**S4**)

**Fig. S7** First heating DSC thermogram of ESOA

**Fig. S8** First heating DSC thermogram of Cys

**Fig. S9** First heating DSC thermograms of ESOA-Cys_1:1 (a), and ESOA-Cys_2:1 (b) at different curing times at 100 °C: 0 minutes (green), 5 minutes (light green), 10 minutes (yellow), 20 minutes (orange), 40 minutes (red), 48 hours (brown)

**Fig. S10** DSC First heating curves of ESOA-Cys_1:1_100_48 (red) and ESOA-Cys_2:1_100_48 (blue)

**Fig. S11** TGA (a) and DTG (b) curves of: ESOA (green), Cys (grey), ESOA-Cys_1:1_100_48 (red), and ESOA-Cys_2:1_100_48 (blue)

**Fig. S12** Isothermal TGA curves at 180 °C for ESOA-Cys_1:1_100_48 (red) and ESOA-Cys_2:1_100_48 (blue)

**Fig. S13** Frequency sweep plate-plate rheometer plots for ESOA-Cys_1:1_100_48 and ESOA-Cys_2:1_100_48. Tests were carried out at 180°C and 0.5% deformation between 0.01 and 100 rad/s

**Table S4**: Stress-relaxation characteristic times

| Sample | τ @T=170°C [min] | τ @T=165°C [min] | τ @T=160°C [min] | τ @T=155°C [min] | τ @T=150°C [min] |
| --- | --- | --- | --- | --- | --- |
| **ESOA-Cys_1:1_100_48** | 2.5 | 3 | 6 | 13.5 | 33 |
| **ESOA-Cys_2:1_100_48** | 17 | 48 | 146 | 377* | 919* |

*:Values predicted with the stretched exponential fitting.

**Fig. S14** Representative photos of the ESOA-Cys_1:1_100_48 specimens recovered after hot pressing during the recycling tests at: 160 °C (a), 170 °C (b), 180 °C (c)

**Fig. S15** FTIR spectra of ESOA-Cys_2:1_100_48 before and after several hot pressing cycles

**Fig. S16** Representative photos of the ESOA-Cys_2:1_100_48 before (a and b) and after (c) the self-healing test
